# Supplementary material
Source: PubMed Central journal article supplement (PMC4785874)

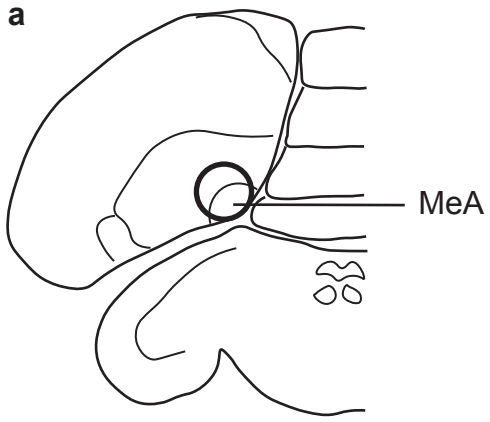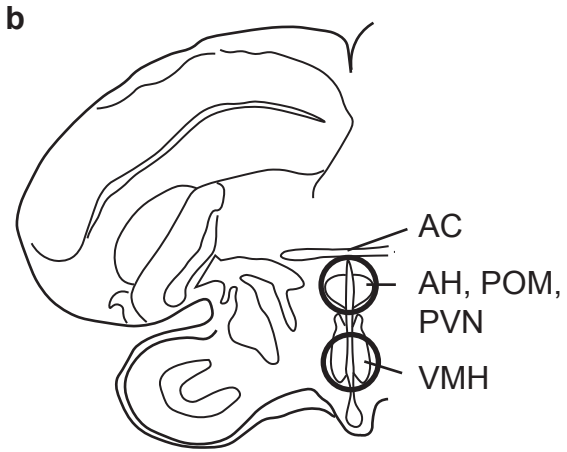

# Correspondence of MeA and HYP modules

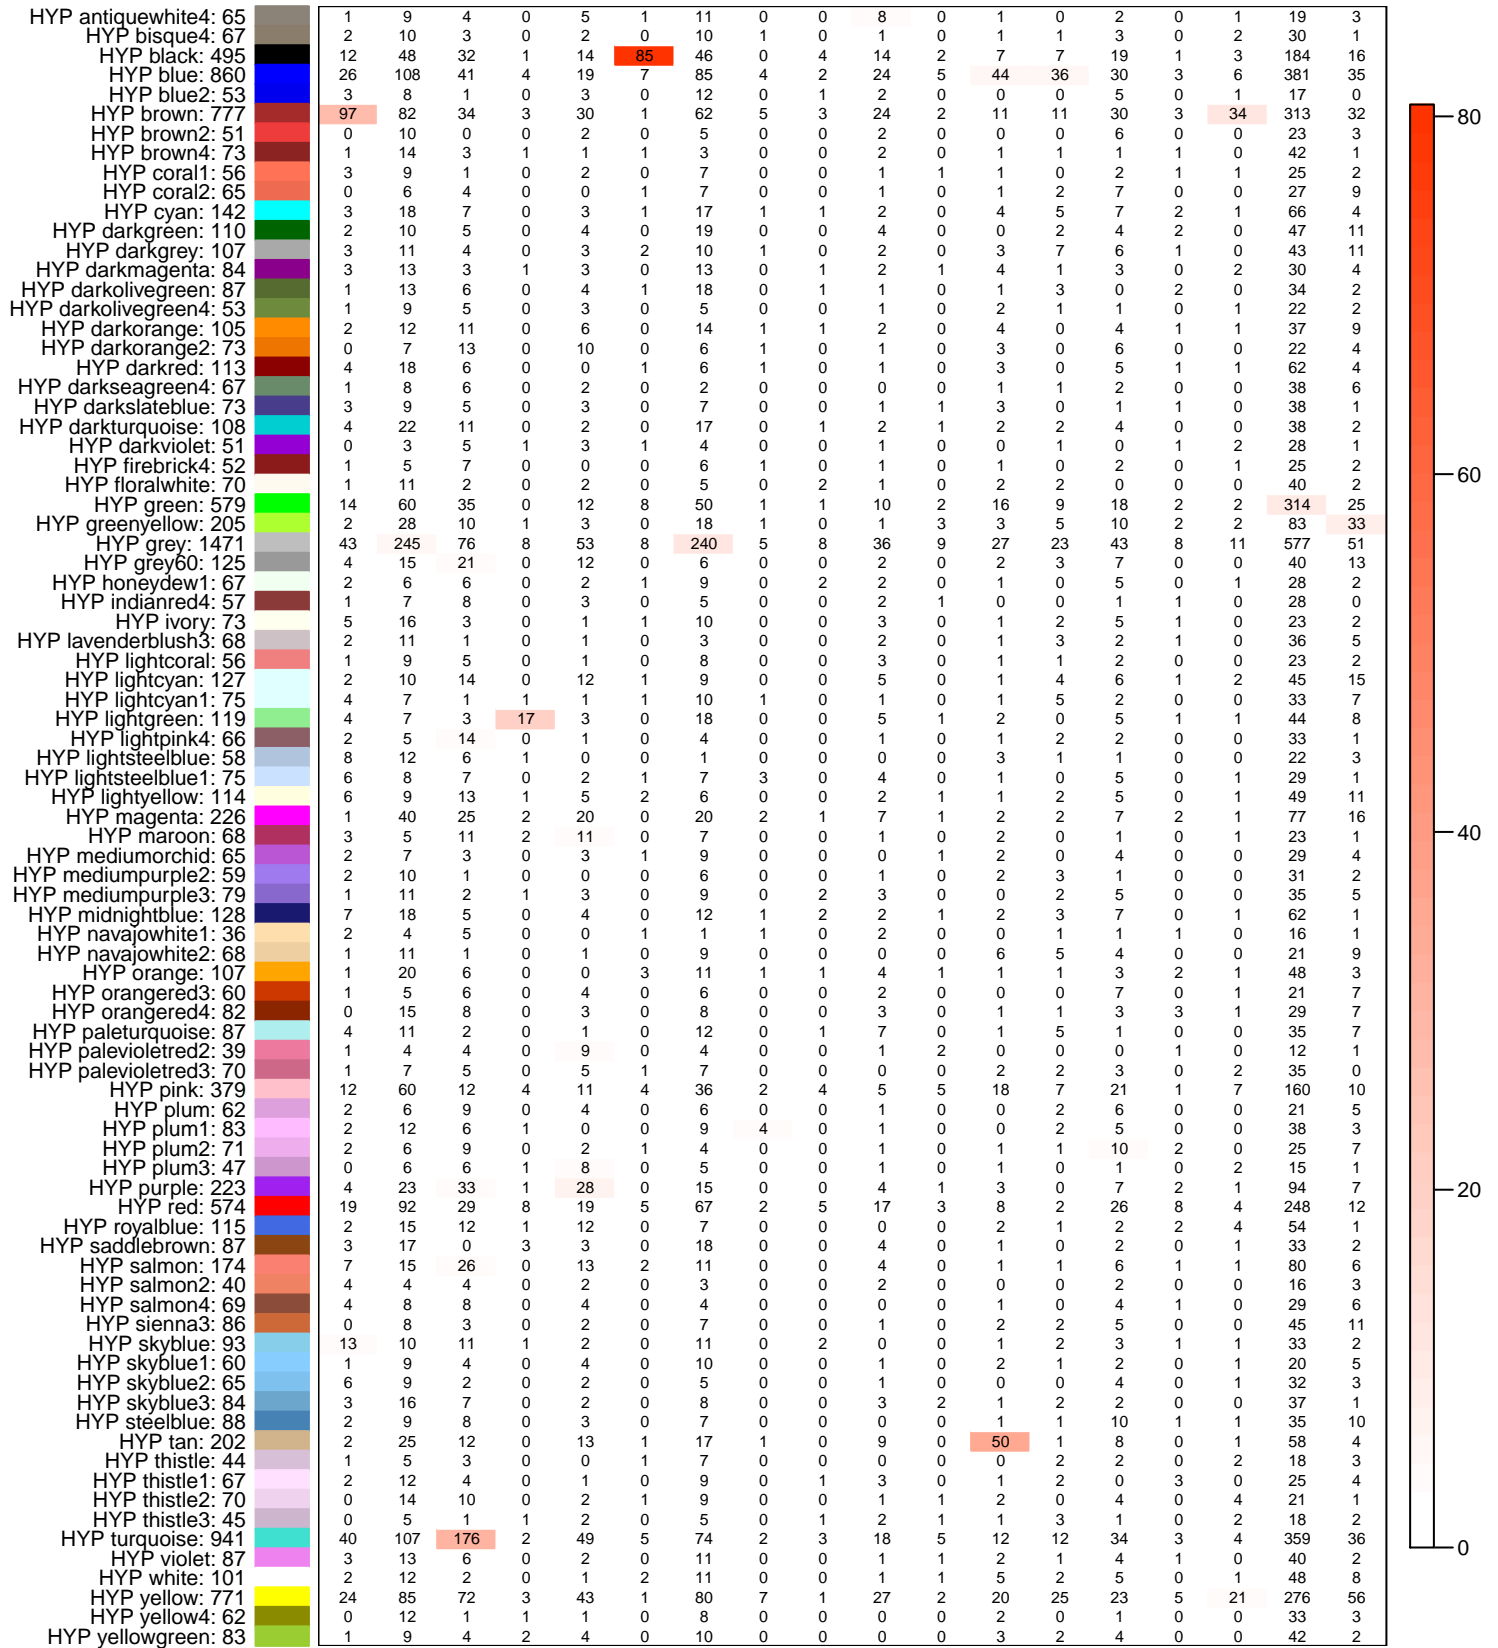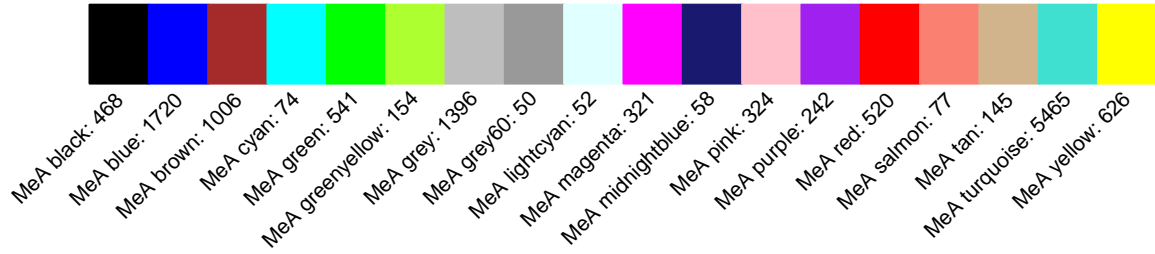

Supplement: NIHMS722546-supplement-Supp_FigureS1-S2.pdf [file NIHMS722546-supplement-Supp_FigureS1-S2.pdf]
